# Supplementary material
Source: bioRxiv or medRxiv preprint supplement (https://medrxiv.org/highwire/filestream/87834/field_highwire_adjunct_files/0/2020.06.24.20135038-1.pdf)
Supplement: Supplementary file [file 2020.06.24.20135038-1.pdf]

# Differential occupational risks to healthcare workers from SARS-CoV-

## 2: A prospective observational study

### Supplementary materials

#### Supplementary methods

##### Setting and data collection

OUP has 13,800 employed staff. Testing for symptomatic staff and their household contacts was offered by the hospital's Occupational Health department between days two and four of symptoms.

A voluntary asymptomatic screening programme for staff working anywhere on site commenced on 23<sup>rd</sup> April 2020. Nasopharyngeal and oropharyngeal swabs and blood samples were obtained by specially-trained nurses, medical students and other healthcare professionals.

Appointments were available up to six days a week across all hospitals, with staff required to register details on a bespoke website within the NHS network prior to booking. Data were collected on age, self-reported gender and ethnicity, role, working location and history of symptoms, whether they were patient facing, and whether they had at any time been exposed to a patient with Covid-19 without any PPE. Staff were asked whether they believed they had had Covid-19 already, and whether they had had household or community-based contact with a suspected or confirmed Covid-19 case.

Automated reporting of results was followed-up with a phone call for positive PCR results to distinguish contemporaneous from previous infection (>7 days ago). The former were asked to self-isolate for seven days, and their household contacts for 14 days.

## Laboratory assays

RT-PCR was performed at OUH using the PHE SARS-CoV-2 assay (targeting the RdRp gene), or one of two commercial assays: Abbott RealTime (targeting RdRp and N genes; Abbott, Maidenhead, UK) or Altona RealStar (targeting E and S genes; Altona Diagnostics, Liverpool, UK). Samples from 2 days of testing were processed by the UK Lighthouse Labs network (Milton Keynes) using the Thermo Fisher TaqPath assay (targeting S and N genes, and ORF1ab; Thermo Fisher, Abingdon, UK).

Serological investigations were performed by chemiluminescent microparticle immunoassay (CMIA) for IgG to nucleocapsid protein on Abbott Architect (Abbott, Maidenhead, UK) with a manufacturer's signal-to-cut-off index of 1.4, and an enzyme-linked immunosorbent assay (ELISA) platform developed at the Target Discovery Institute (University of Oxford) detecting IgG to trimeric spike antigen, using net-normalised signal cut-off of 8 million.(1)

## Statistical analysis

Univariable and multivariable logistic regression was performed to assess risk factors for infection using a composite end point of 'Covid-19 at any time', based on a positive RT-PCR test or the detection of IgG by ELISA and/or CMIA. Natural cubic splines were used to account for non-linear relationships with continuous variables. Given the number of potential predictors fitted, backwards model selection was undertaken using AIC values. We screened for first-order interactions between main effects using a Wald p-value threshold of <0.01.

Similarly, univariable and multivariable logistic regression, was used to assess associations between 'Covid-19 at any time' and 11 self-reported symptoms prior to testing. As only 11 potential predictors were included in the model variable selection was not undertaken.

Univariable and multivariable linear regression was used to assess the relationship between ward-based Covid-19 patient infectious pressure and the proportion of staff working on a ward with Covid-19. Covid-19 infectious pressure was calculated by considering each patient infectious from -2 to +7

days around the date of their first positive SARS-CoV-2 PCR test. Only staff working in a single ward were included in the analysis.

Analyses were performed using R, version 3.6.3.

## References

1. Adams ER, Ainsworth M, Anand R, Andersson MI, Auckland K, Baillie JK, et al. Antibody testing for COVID-19: A report from the National COVID Scientific Advisory Panel. Wellcome Open Res. 2020 Jun 11;5:139.

## Supplementary figures

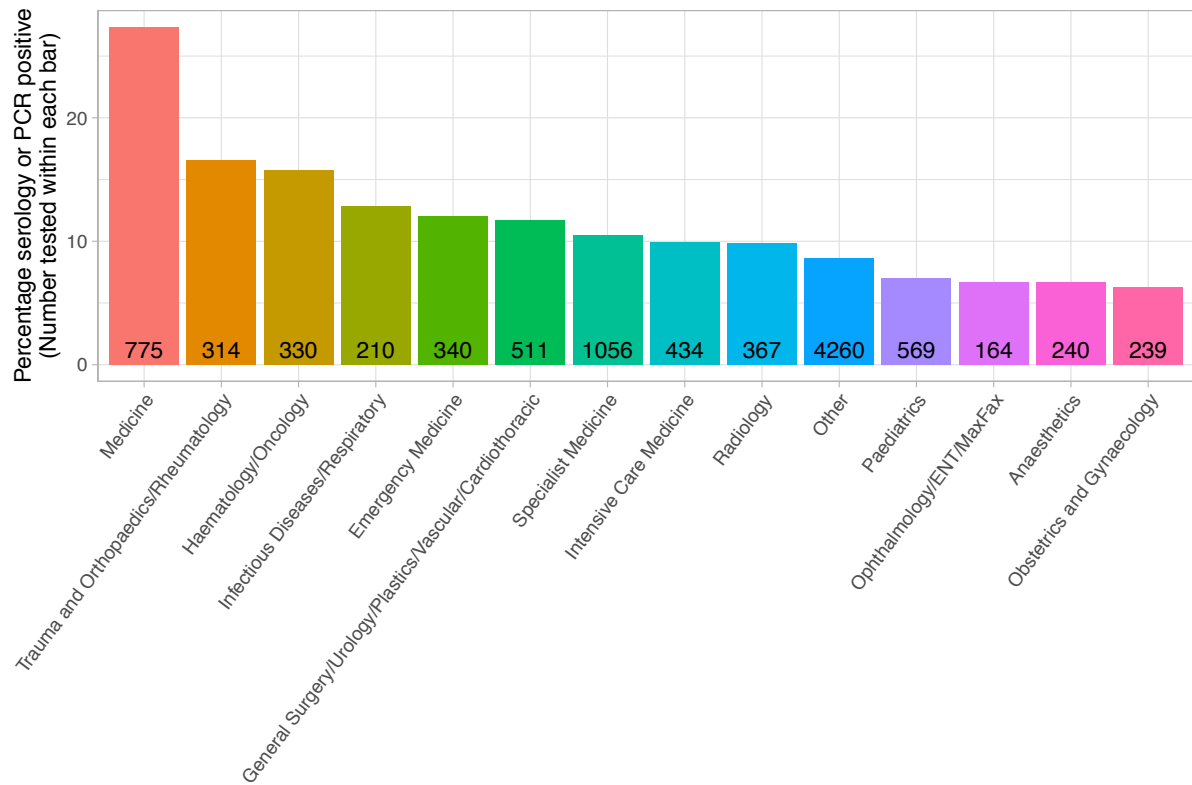

**Figure S1. Proportion of staff testing positive by specialty.** The number of staff within each speciality tested is shown within each bar. The “Other” group includes staff members without a speciality.

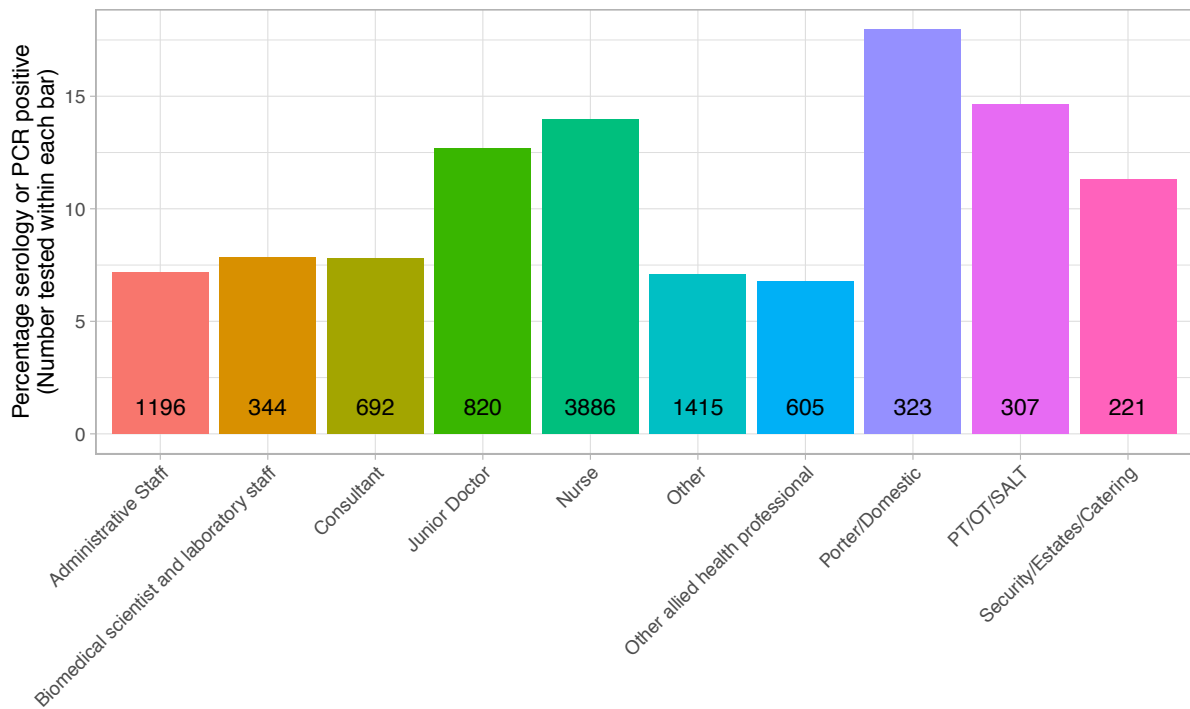

**Figure S2. Proportion of staff testing positive by role.** The number of staff within each role tested is shown within each bar. PT, physiotherapist; OT, occupational therapist; SALT, speech and language therapist. Consultant represents senior medical staff.

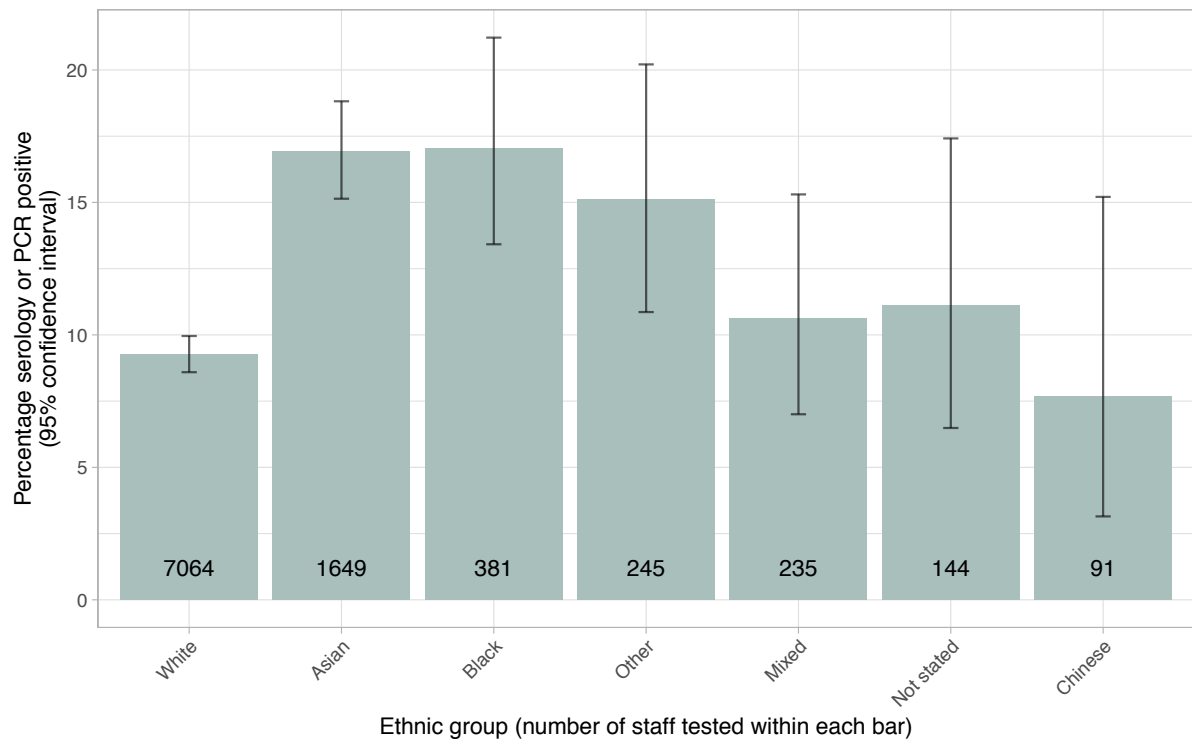

**Figure S3. Proportion of staff testing positive by self-described ethnicity.**

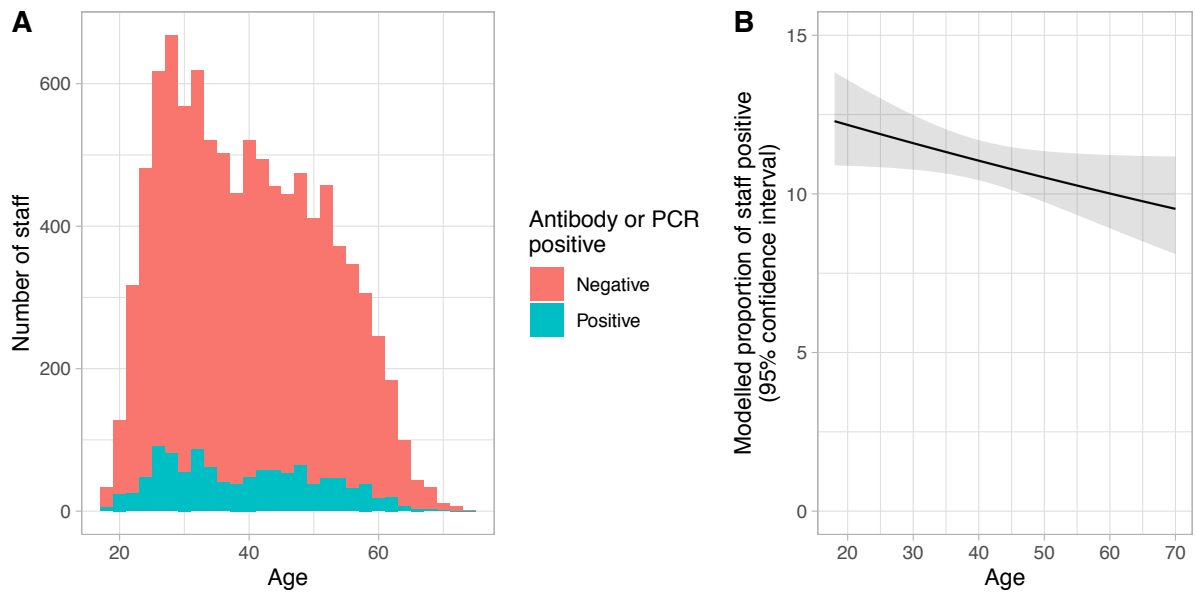

**Figure S4. Relationship between age and Covid-19 infection in hospital staff.** Panel A shows a histogram of staff ages for those attending asymptomatic screening. Panel B shows the univariable modelled proportion of staff positive by age.



Supplementary tables

|                                            | PPE                                                                                                                                                                                                                                                                                                                                                                                                   | Testing                                                                                                                                                                                                          |
|--------------------------------------------|-------------------------------------------------------------------------------------------------------------------------------------------------------------------------------------------------------------------------------------------------------------------------------------------------------------------------------------------------------------------------------------------------------|------------------------------------------------------------------------------------------------------------------------------------------------------------------------------------------------------------------|
| <b>Until 25<sup>th</sup> February 2020</b> | <ul style="list-style-type: none"> <li>▪ Full length gown, gloves, correctly fitted FFP3 mask and full face visor (level-2 PPE)</li> <li>▪ Side room isolation</li> </ul>                                                                                                                                                                                                                             | <ul style="list-style-type: none"> <li>▪ Clinical syndrome with relevant travel history</li> </ul>                                                                                                               |
| <b>25<sup>th</sup> February</b>            | <ul style="list-style-type: none"> <li>▪ As above for suspected cases with travel history</li> <li>▪ For severe community acquired pneumonia without travel history: gown/apron, gloves, and fluid repellent mask (FFP3 for aerosol generating procedures); no need to isolate pending test</li> </ul>                                                                                                | <ul style="list-style-type: none"> <li>▪ Clinical syndrome with relevant travel history</li> <li>▪ Severe community acquired pneumonia</li> </ul>                                                                |
| <b>8<sup>th</sup> March</b>                | <ul style="list-style-type: none"> <li>▪ Fluid resistant surgical masks, gloves, apron and eye protection for symptomatic but unconfirmed inpatients (level-1 PPE)</li> <li>▪ Full level-2 PPE for confirmed cases and Aerosol Generating Procedures (AGPs).</li> </ul>                                                                                                                               | <ul style="list-style-type: none"> <li>▪ Clinical syndrome with relevant travel history</li> <li>▪ Severe community acquired pneumonia</li> </ul>                                                                |
| <b>13<sup>th</sup> March</b>               | <ul style="list-style-type: none"> <li>▪ Fluid resistant surgical masks, gloves, apron and risk assessment for eye protection for suspected and confirmed Covid-19 inpatients (level-1 PPE)</li> <li>▪ Surgical masks on entry to Covid-19 cohort wards</li> <li>▪ Apron, gloves and FFP3 mask on intensive care</li> <li>▪ FFP3 mask, disposable gown, eye protection and gloves for AGPs</li> </ul> | <ul style="list-style-type: none"> <li>▪ Any respiratory illness requiring admission to hospital and either radiological evidence of pneumonia or ARDS or influenza-like illness with fever &gt;37.8C</li> </ul> |
| <b>14-16<sup>th</sup> March</b>            | <ul style="list-style-type: none"> <li>▪ As above</li> <li>▪ All suspected Covid-19 patients admitted directly via acute medicine</li> </ul>                                                                                                                                                                                                                                                          | <ul style="list-style-type: none"> <li>▪ Any influenza like illness</li> </ul>                                                                                                                                   |

|                              |                                                                                                                                                                                                                                                                                         |                                                                                                                                                                                                     |
|------------------------------|-----------------------------------------------------------------------------------------------------------------------------------------------------------------------------------------------------------------------------------------------------------------------------------------|-----------------------------------------------------------------------------------------------------------------------------------------------------------------------------------------------------|
|                              | (bypassing the emergency department)                                                                                                                                                                                                                                                    |                                                                                                                                                                                                     |
| <b>1<sup>st</sup> April</b>  | <ul style="list-style-type: none"> <li>▪ Universal minimum level-1 PPE across all wards</li> <li>▪ Level-2 PPE for AGPs as above</li> </ul>                                                                                                                                             |                                                                                                                                                                                                     |
| <b>6<sup>th</sup> April</b>  | <ul style="list-style-type: none"> <li>▪ AGPs: gloves, disposable gown, FFP3 mask, eye protection</li> <li>▪ Working in higher risk area (ICU/High Dependency Unit) with confirmed cases: gloves, apron, gown, FFP3 mask and eye protection</li> <li>▪ Level-1 PPE elsewhere</li> </ul> | <ul style="list-style-type: none"> <li>▪ Diagnosis based on either positive swab or 'Covid-19 syndrome' (influenza like illness and compatible radiology and no alternative explanation)</li> </ul> |
| <b>24<sup>th</sup> April</b> |                                                                                                                                                                                                                                                                                         | <ul style="list-style-type: none"> <li>▪ Universal admission testing for all patients irrespective of clinical syndrome</li> </ul>                                                                  |

**Table S1. Local recommendations for PPE and testing, based on contemporaneous national Public Health England guidance.**

|                                           |              | Abbott Architect CMIA |                 |               |
|-------------------------------------------|--------------|-----------------------|-----------------|---------------|
|                                           |              | Detected              | Not detected    | Not tested    |
| Target<br>Discovery<br>Institute<br>ELISA | Detected     | 768<br>(7.8%)         | 101<br>(1.0%)   | 19<br>(0.2%)  |
|                                           | Not detected | 112<br>(1.1%)         | 8075<br>(82.3%) | 140<br>(1.4%) |
|                                           | Not tested   | 16<br>(0.2%)          | 225<br>(2.3%)   | 353<br>(3.6%) |

**Supplementary table S2. Comparison of serology results by two methods, the Abbott Architect i2000 and Target Discovery Institute ELISA.** Results shown for 9809 staff who were tested by serology or PCR with table percentages.

| Variable group                | Variables                                                            |                                    |                                             |                                      | Descriptive                           |                                                |                                        | Univariable |             |              |         | Multivariable |             |              |         |
|-------------------------------|----------------------------------------------------------------------|------------------------------------|---------------------------------------------|--------------------------------------|---------------------------------------|------------------------------------------------|----------------------------------------|-------------|-------------|--------------|---------|---------------|-------------|--------------|---------|
|                               | Variable                                                             | Number of staff with this exposure | Number of positive staff with this exposure | Percentage of exposed staff positive | Number of staff without this exposure | Number of positive staff without this exposure | Percentage of unexposed staff positive | Odds ratio  | Lower 95%CI | Upper 95% CI | p-value | Odds ratio    | Lower 95%CI | Upper 95% CI | p-value |
| Work in Covid-19 patient area | No                                                                   | 7193                               | 601                                         | 8.40%                                |                                       |                                                |                                        | 1           |             |              |         | 1             |             |              |         |
|                               | Yes                                                                  | 1553                               | 346                                         | 22.30%                               |                                       |                                                |                                        | 3.14        | 2.72        | 3.64         | <0.001  | 2.49          | 2           | 3.12         | <0.001  |
|                               | Work everywhere                                                      | 1063                               | 136                                         | 12.80%                               |                                       |                                                |                                        | 1.61        | 1.32        | 1.96         | <0.001  | 1.43          | 1.07        | 1.91         | 0.015   |
| Speciality                    | Other or none                                                        | 4260                               | 367                                         | 8.60%                                |                                       |                                                |                                        | 1           |             |              |         | 1             |             |              |         |
|                               | Anaesthetics                                                         | 240                                | 16                                          | 6.70%                                |                                       |                                                |                                        | 0.76        | 0.45        | 1.27         | 0.294   | 0.73          | 0.41        | 1.3          | 0.28    |
|                               | Emergency Medicine                                                   | 340                                | 41                                          | 12.10%                               |                                       |                                                |                                        | 1.45        | 1.03        | 2.05         | 0.033   | 1.08          | 0.7         | 1.66         | 0.72    |
|                               | General Surgery, Urology, Plastics, Vascular, Cardiothoracic Surgery | 511                                | 60                                          | 11.70%                               |                                       |                                                |                                        | 1.41        | 1.06        | 1.89         | 0.02    | 0.92          | 0.63        | 1.35         | 0.674   |
|                               | Haematology, Oncology                                                | 330                                | 52                                          | 15.80%                               |                                       |                                                |                                        | 1.98        | 1.45        | 2.72         | <0.001  | 1.97          | 1.32        | 2.93         | 0.001   |
|                               | Infectious Diseases, Respiratory                                     | 210                                | 27                                          | 12.90%                               |                                       |                                                |                                        | 1.57        | 1.03        | 2.38         | 0.036   | 0.79          | 0.47        | 1.32         | 0.368   |
|                               | Intensive Care Medicine                                              | 434                                | 43                                          | 9.90%                                |                                       |                                                |                                        | 1.17        | 0.84        | 1.63         | 0.364   | 0.46          | 0.29        | 0.72         | 0.001   |
|                               | Medicine                                                             | 775                                | 212                                         | 27.40%                               |                                       |                                                |                                        | 3.99        | 3.3         | 4.83         | <0.001  | 1.5           | 1.05        | 2.15         | 0.027   |
|                               | Obstetrics and Gynaecology                                           | 239                                | 15                                          | 6.30%                                |                                       |                                                |                                        | 0.71        | 0.42        | 1.21         | 0.209   | 0.69          | 0.38        | 1.24         | 0.214   |

| Variable group | Variables                                                          |                                    |                                             | Descriptive                          |                                       |                                                | Univariable                            |            |             |              | Multivariable |            |             |              |         |
|----------------|--------------------------------------------------------------------|------------------------------------|---------------------------------------------|--------------------------------------|---------------------------------------|------------------------------------------------|----------------------------------------|------------|-------------|--------------|---------------|------------|-------------|--------------|---------|
|                | Variable                                                           | Number of staff with this exposure | Number of positive staff with this exposure | Percentage of exposed staff positive | Number of staff without this exposure | Number of positive staff without this exposure | Percentage of unexposed staff positive | Odds ratio | Lower 95%CI | Upper 95% CI | p-value       | Odds ratio | Lower 95%CI | Upper 95% CI | p-value |
|                | Ophthalmology, Ear, nose and throat surgery, Maxillofacial surgery | 164                                | 11                                          | 6.70%                                |                                       |                                                |                                        | 0.76       | 0.41        | 1.42         | 0.393         | 0.79       | 0.41        | 1.55         | 0.5     |
|                | Paediatrics                                                        | 569                                | 40                                          | 7.00%                                |                                       |                                                |                                        | 0.8        | 0.57        | 1.13         | 0.202         | 0.78       | 0.51        | 1.18         | 0.237   |
|                | Radiology                                                          | 367                                | 36                                          | 9.80%                                |                                       |                                                |                                        | 1.15       | 0.8         | 1.65         | 0.437         | 1.01       | 0.61        | 1.67         | 0.972   |
|                | Specialist Medicine                                                | 1056                               | 111                                         | 10.50%                               |                                       |                                                |                                        | 1.25       | 1           | 1.56         | 0.054         | 0.87       | 0.62        | 1.2          | 0.39    |
|                | Trauma and Orthopaedics, Rheumatology                              | 314                                | 52                                          | 16.60%                               |                                       |                                                |                                        | 2.11       | 1.53        | 2.89         | <0.001        | 1.81       | 1.21        | 2.69         | 0.004   |
| <b>Role</b>    | Administrative Staff                                               | 1196                               | 86                                          | 7.20%                                |                                       |                                                |                                        | 1          |             |              |               | 1          |             |              |         |
|                | Biomedical scientist and laboratory staff                          | 344                                | 27                                          | 7.80%                                |                                       |                                                |                                        | 1.1        | 0.7         | 1.72         | 0.68          | 1.06       | 0.67        | 1.66         | 0.812   |
|                | Consultant                                                         | 692                                | 54                                          | 7.80%                                |                                       |                                                |                                        | 1.09       | 0.77        | 1.56         | 0.624         | 0.81       | 0.52        | 1.26         | 0.347   |
|                | Junior Doctor                                                      | 820                                | 104                                         | 12.70%                               |                                       |                                                |                                        | 1.87       | 1.39        | 2.53         | <0.001        | 1.01       | 0.67        | 1.51         | 0.974   |
|                | Nurse                                                              | 3886                               | 543                                         | 14.00%                               |                                       |                                                |                                        | 2.1        | 1.65        | 2.66         | <0.001        | 1.31       | 0.93        | 1.84         | 0.123   |
|                | Other                                                              | 1415                               | 100                                         | 7.10%                                |                                       |                                                |                                        | 0.98       | 0.73        | 1.32         | 0.903         | 0.82       | 0.6         | 1.11         | 0.19    |
|                | Other allied health professional                                   | 605                                | 41                                          | 6.80%                                |                                       |                                                |                                        | 0.94       | 0.64        | 1.38         | 0.746         | 0.76       | 0.48        | 1.22         | 0.261   |
|                | Porter, Domestic cleaner                                           | 323                                | 58                                          | 18.00%                               |                                       |                                                |                                        | 2.82       | 1.97        | 4.04         | <0.001        | 1.93       | 1.25        | 2.97         | 0.003   |

| Variable group             | Variables                                                              |                                    |                                             |                                      | Descriptive                           |                                                |                                        | Univariable |             |              |         | Multivariable |             |              |         |
|----------------------------|------------------------------------------------------------------------|------------------------------------|---------------------------------------------|--------------------------------------|---------------------------------------|------------------------------------------------|----------------------------------------|-------------|-------------|--------------|---------|---------------|-------------|--------------|---------|
|                            | Variable                                                               | Number of staff with this exposure | Number of positive staff with this exposure | Percentage of exposed staff positive | Number of staff without this exposure | Number of positive staff without this exposure | Percentage of unexposed staff positive | Odds ratio  | Lower 95%CI | Upper 95% CI | p-value | Odds ratio    | Lower 95%CI | Upper 95% CI | p-value |
|                            | Physiotherapist, Occupational therapist, Speech and Language therapist | 307                                | 45                                          | 14.70%                               |                                       |                                                |                                        | 2.22        | 1.51        | 3.26         | <0.001  | 1.52          | 0.95        | 2.42         | 0.08    |
|                            | Security, Estates, Catering                                            | 221                                | 25                                          | 11.30%                               |                                       |                                                |                                        | 1.65        | 1.03        | 2.64         | 0.038   | 1.35          | 0.83        | 2.2          | 0.219   |
| <b>Ethnicity</b>           | White                                                                  | 7064                               | 654                                         | 9.30%                                |                                       |                                                |                                        | 1           |             |              |         | 1             |             |              |         |
|                            | Asian                                                                  | 1649                               | 279                                         | 16.90%                               |                                       |                                                |                                        | 2           | 1.71        | 2.32         | <0.001  | 1.58          | 1.34        | 1.86         | <0.001  |
|                            | Black                                                                  | 381                                | 65                                          | 17.10%                               |                                       |                                                |                                        | 2.02        | 1.53        | 2.66         | <0.001  | 1.61          | 1.2         | 2.16         | 0.001   |
|                            | Chinese                                                                | 91                                 | 7                                           | 7.70%                                |                                       |                                                |                                        | 0.82        | 0.38        | 1.77         | 0.609   | 0.81          | 0.36        | 1.8          | 0.596   |
|                            | Mixed                                                                  | 235                                | 25                                          | 10.60%                               |                                       |                                                |                                        | 1.17        | 0.76        | 1.78         | 0.474   | 1.15          | 0.75        | 1.78         | 0.517   |
|                            | Not stated                                                             | 144                                | 16                                          | 11.10%                               |                                       |                                                |                                        | 1.23        | 0.72        | 2.07         | 0.449   | 1.11          | 0.65        | 1.92         | 0.697   |
|                            | Other                                                                  | 245                                | 37                                          | 15.10%                               |                                       |                                                |                                        | 1.74        | 1.22        | 2.5          | 0.002   | 1.28          | 0.88        | 1.87         | 0.194   |
| <b>Gender</b>              | Female                                                                 | 7284                               | 779                                         | 10.70%                               |                                       |                                                |                                        |             |             |              |         |               |             |              |         |
|                            | Male                                                                   | 2506                               | 301                                         | 12.00%                               |                                       |                                                |                                        | 1.14        | 0.99        | 1.31         | 0.07    |               |             |              |         |
|                            | Prefer not to say                                                      | 14                                 | 2                                           | 14.30%                               |                                       |                                                |                                        | 1.39        | 0.31        | 6.23         | 0.666   |               |             |              |         |
|                            | Trans                                                                  | 5                                  | 1                                           | 20.00%                               |                                       |                                                |                                        | 2.09        | 0.23        | 18.7         | 0.511   |               |             |              |         |
| <b>Community exposures</b> | Contact with a known Covid-19 case outside work                        | 329                                | 79                                          | 24.00%                               | 9478                                  | 1002                                           | 10.60%                                 | 2.67        | 2.06        | 3.47         | <0.001  |               |             |              |         |
|                            | Household contact with a known Covid-19 case                           | 170                                | 64                                          | 37.60%                               | 9637                                  | 1017                                           | 10.60%                                 | 5.12        | 3.73        | 7.03         | <0.001  | 4.63          | 3.3         | 6.5          | <0.001  |

| Variable group             | Variables                                                      |                                    |                                             | Descriptive                          |                                       |                                                | Univariable                            |            |             |              | Multivariable |            |             |              |         |
|----------------------------|----------------------------------------------------------------|------------------------------------|---------------------------------------------|--------------------------------------|---------------------------------------|------------------------------------------------|----------------------------------------|------------|-------------|--------------|---------------|------------|-------------|--------------|---------|
|                            | Variable                                                       | Number of staff with this exposure | Number of positive staff with this exposure | Percentage of exposed staff positive | Number of staff without this exposure | Number of positive staff without this exposure | Percentage of unexposed staff positive | Odds ratio | Lower 95%CI | Upper 95% CI | p-value       | Odds ratio | Lower 95%CI | Upper 95% CI | p-value |
|                            | Contact with a possible Covid-19 case outside work             | 820                                | 117                                         | 14.30%                               | 8987                                  | 964                                            | 10.70%                                 | 1.39       | 1.13        | 1.7          | 0.002         |            |             |              |         |
|                            | Household contact with a possible Covid-19 case                | 551                                | 89                                          | 16.20%                               | 9256                                  | 992                                            | 10.70%                                 | 1.6        | 1.27        | 2.03         | <0.001        | 1.79       | 1.4         | 2.3          | <0.001  |
|                            | Live with another healthcare worker                            | 2449                               | 325                                         | 13.30%                               | 7358                                  | 756                                            | 10.30%                                 | 1.34       | 1.16        | 1.54         | <0.001        |            |             |              |         |
| <b>Healthcare exposure</b> | Healthcare exposure to known or suspected Covid-19 without PPE | 2119                               | 354                                         | 16.70%                               | 7688                                  | 727                                            | 9.50%                                  | 1.92       | 1.67        | 2.2          | <0.001        | 1.44       | 1.24        | 1.68         | <0.001  |
|                            |                                                                | <b>Median - positive staff</b>     | <b>IQR - positive staff</b>                 |                                      | <b>Median - positive staff</b>        | <b>IQR - positive staff</b>                    |                                        |            |             |              |               |            |             |              |         |
| <b>Age, per 10 years</b>   |                                                                | 39                                 | 29-49                                       |                                      | 40                                    | 30-50                                          |                                        | 0.95       | 0.9         | 1            | 0.045         |            |             |              |         |

**Supplementary Table S3. Univariable (panel A) and multivariable (panel B) relationships between risk factors and staff infection with SARS-CoV-2.**

Pairwise interactions were sought between all variables the multivariable model, a single interaction exceeded the p<0.01 screening threshold, representing

decreased risk of Covid-19 in Emergency Department staff reporting exposure to a Covid-19 without PPE ( $p=0.002$ ). However, given the large number of interactions sought and biological implausibility the interaction was omitted from the model presented. Consultants are senior doctors.



|                                           |                       | Coefficient, % (95% CI) | p value |
|-------------------------------------------|-----------------------|-------------------------|---------|
| <b>Intercept</b>                          |                       | 32.9 (22.6, 43.2)       | <0.001  |
| <b>Covid-19 pressure, per 1% increase</b> |                       | 0.4 (-0.9, 1.7)         | 0.52    |
| <b>Clinical area</b>                      | Covid-19 general ward | 0.0                     |         |
|                                           | Non Covid-19 area     | -22.2 (-33, -11.4)      | <0.001  |
|                                           | Covid-19 cohort ward  | -14.9 (-37.4, 7.7)      | 0.19    |
|                                           | Covid-19 HDU/ICU      | -28.0 (-45.1, -10.8)    | 0.002   |

**Supplementary Table S4. Multivariable linear regression, relationship between the percentage of staff with Covid-19 and ward-based Covid-19 pressure and ward type.** See Figure 4B for data fitted. Covid-19 cohort wards admitted only patients with suspected or known Covid-19, whereas Covid-19 general wards were acute medical wards receiving new admissions and acute medical patients initially believed not to have Covid-19. Non Covid-19 areas did not admit suspected Covid-19 patients and any suspected or confirmed Covid-19 patients were transferred off these wards as soon as possible.

| <b>Speciality</b>                                                          | <b>Total</b> | <b>Number reporting exposure to a patient with known or suspected Covid-19 without PPE</b> | <b>%</b> |
|----------------------------------------------------------------------------|--------------|--------------------------------------------------------------------------------------------|----------|
| <b>Medicine</b>                                                            | 775          | 325                                                                                        | 42%      |
| <b>Intensive Care Medicine</b>                                             | 434          | 165                                                                                        | 38%      |
| <b>General Surgery, Urology, Plastic, Vascular, Cardiothoracic Surgery</b> | 511          | 170                                                                                        | 33%      |
| <b>Trauma and Orthopaedics, Rheumatology</b>                               | 314          | 102                                                                                        | 32%      |
| <b>Specialist Medicine</b>                                                 | 1056         | 316                                                                                        | 30%      |
| <b>Emergency Medicine</b>                                                  | 340          | 92                                                                                         | 27%      |
| <b>Anaesthetics</b>                                                        | 240          | 60                                                                                         | 25%      |
| <b>Infectious Diseases/Respiratory</b>                                     | 210          | 52                                                                                         | 25%      |
| <b>Radiology</b>                                                           | 367          | 83                                                                                         | 23%      |
| <b>Haematology/Oncology</b>                                                | 330          | 74                                                                                         | 22%      |
| <b>Paediatrics</b>                                                         | 569          | 88                                                                                         | 15%      |
| <b>Obstetrics and Gynaecology</b>                                          | 239          | 33                                                                                         | 14%      |
| <b>Other</b>                                                               | 4260         | 539                                                                                        | 13%      |
| <b>Ophthalmology, Ear nose and throat, Maxillofacial surgery</b>           | 164          | 20                                                                                         | 12%      |

**Supplementary Table S5. Rates of self-reported exposure without PPE by staff speciality.**
